# Supplementary material for: Porous thin sheet-based α-Fe2O3-doped In2O3 structures: hydrothermal synthesis and enhanced Cl2 sensing performance
Source: Royal Society of Chemistry journal article supplement (doi:10.1039/c3ra43616k), 2013-01-01
Supplement: c3ra43616k.pdf [file c3ra43616k.pdf]

### Electronic Supplementary Information

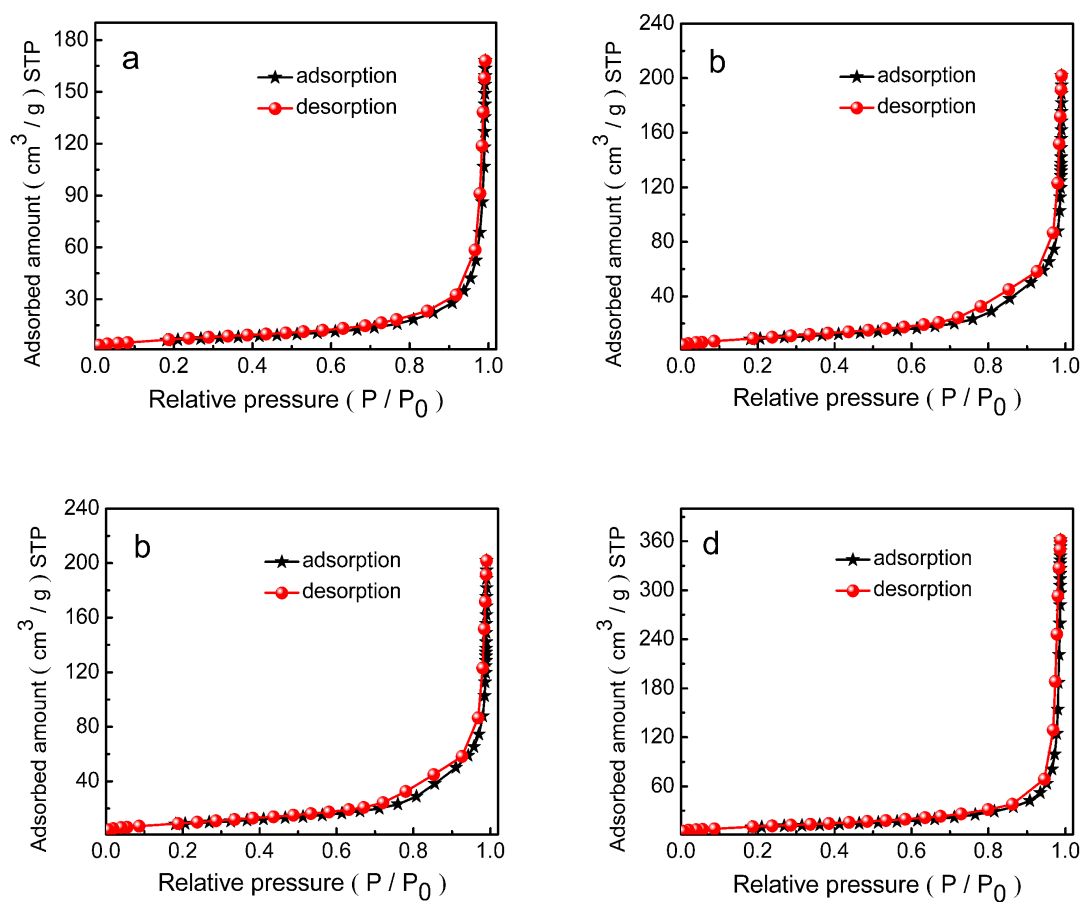

**Fig. 1** N<sub>2</sub> adsorption-desorption curves of (a) S2, (b) S3, (c) S5, and (d) S6.
